# Supplementary material
Source: PubMed Central journal article supplement (PMC2882245)

A. 2nd order Runge-Kutta (R-K) and FACT deterministic tractography output

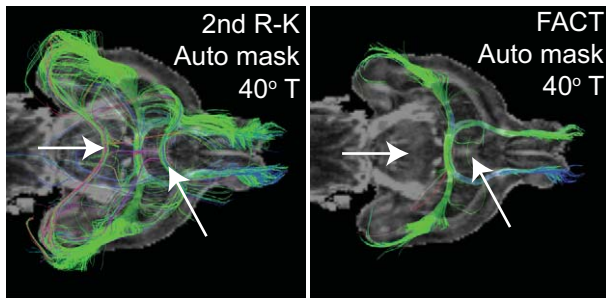

B. Turning angle threshold for FACT tractography output

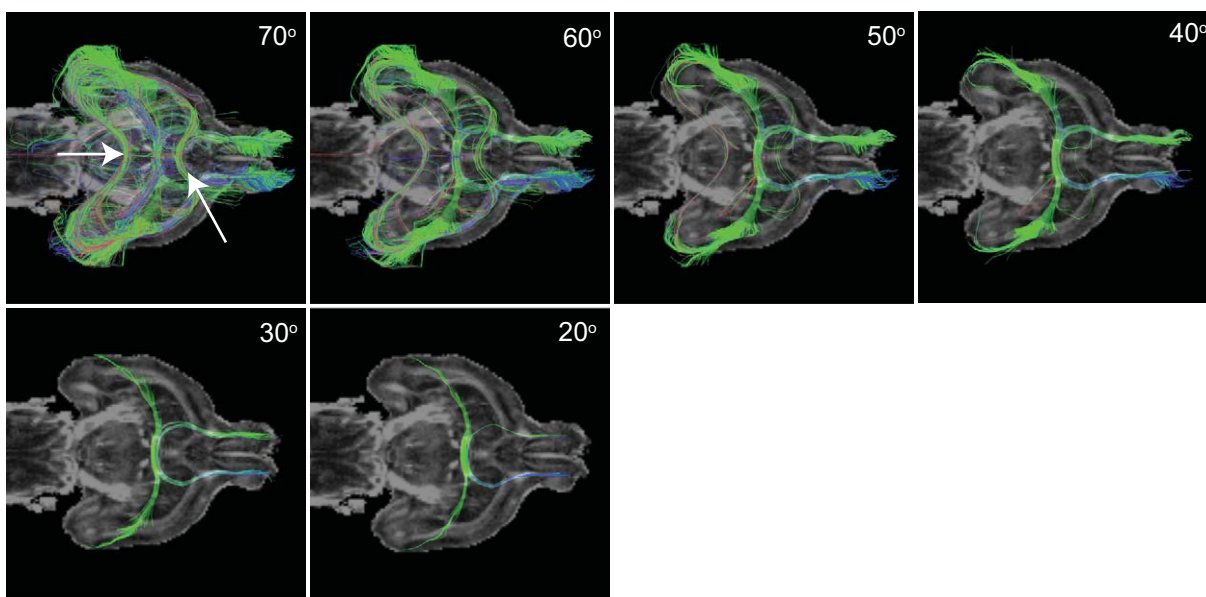

C. Mask threshold for FACT tractography output

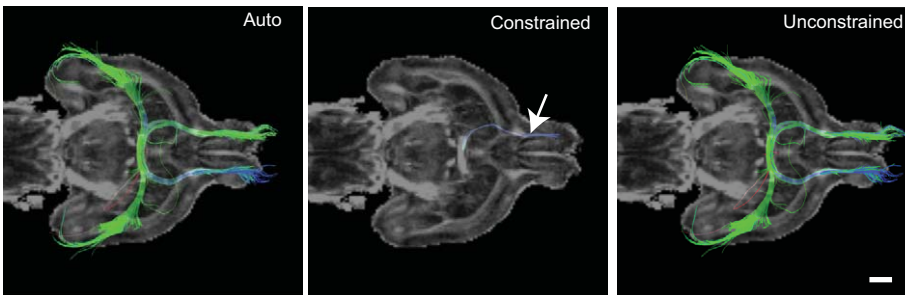

Supplement: NIHMS195872-supplement-02.pdf [file NIHMS195872-supplement-02.pdf]
