# Supplementary material
Source: PubMed Central journal article supplement (PMC2882245)

A. Varying step size in deterministic tractography

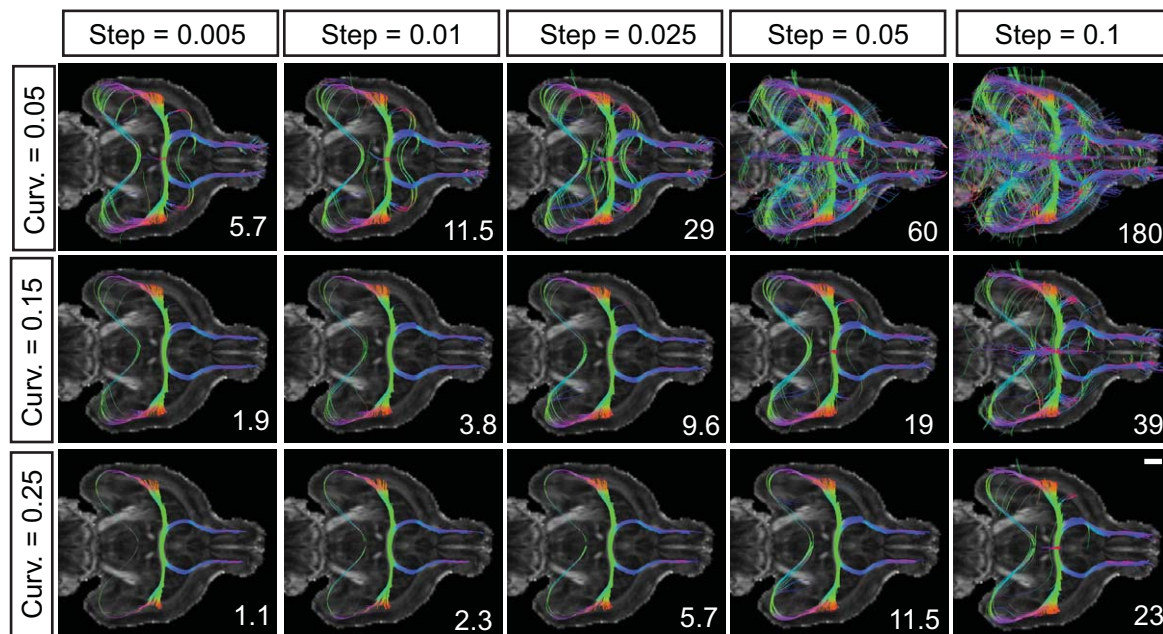

B. AC length limits using Deterministic tractography  
(step size = 0.01; curvature = 0.15; FOD = 0.1)

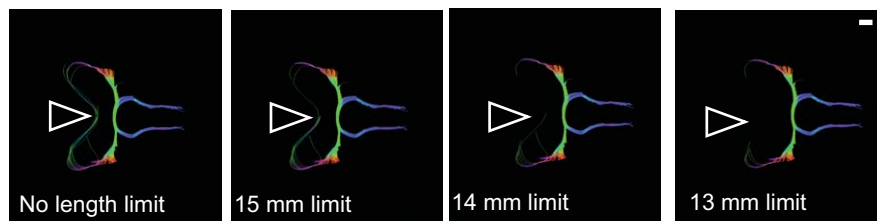

C. Varying step size in probabilistic tractography

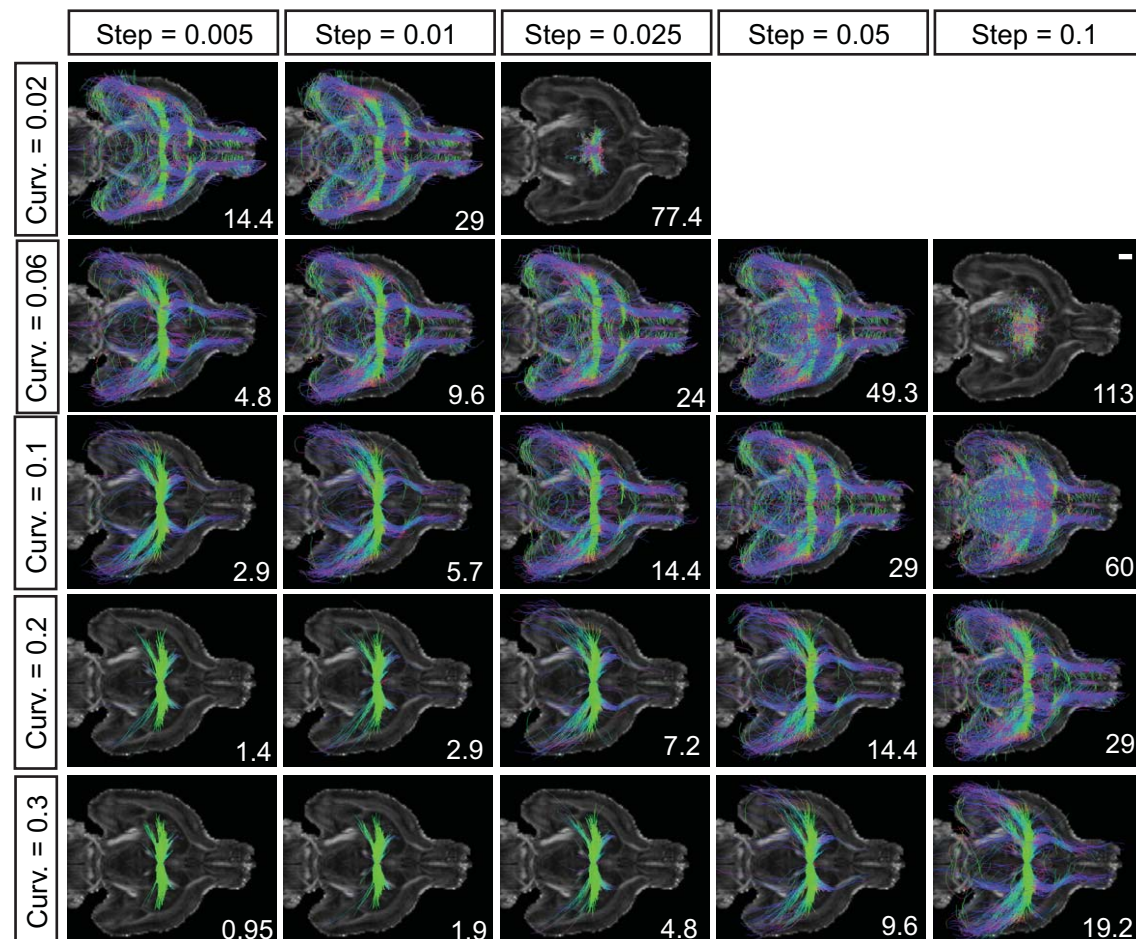

Supplement: NIHMS195872-supplement-03.pdf [file NIHMS195872-supplement-03.pdf]
