# Supplementary material
Source: PubMed Central journal article supplement (PMC2882245)

Regions of interest used

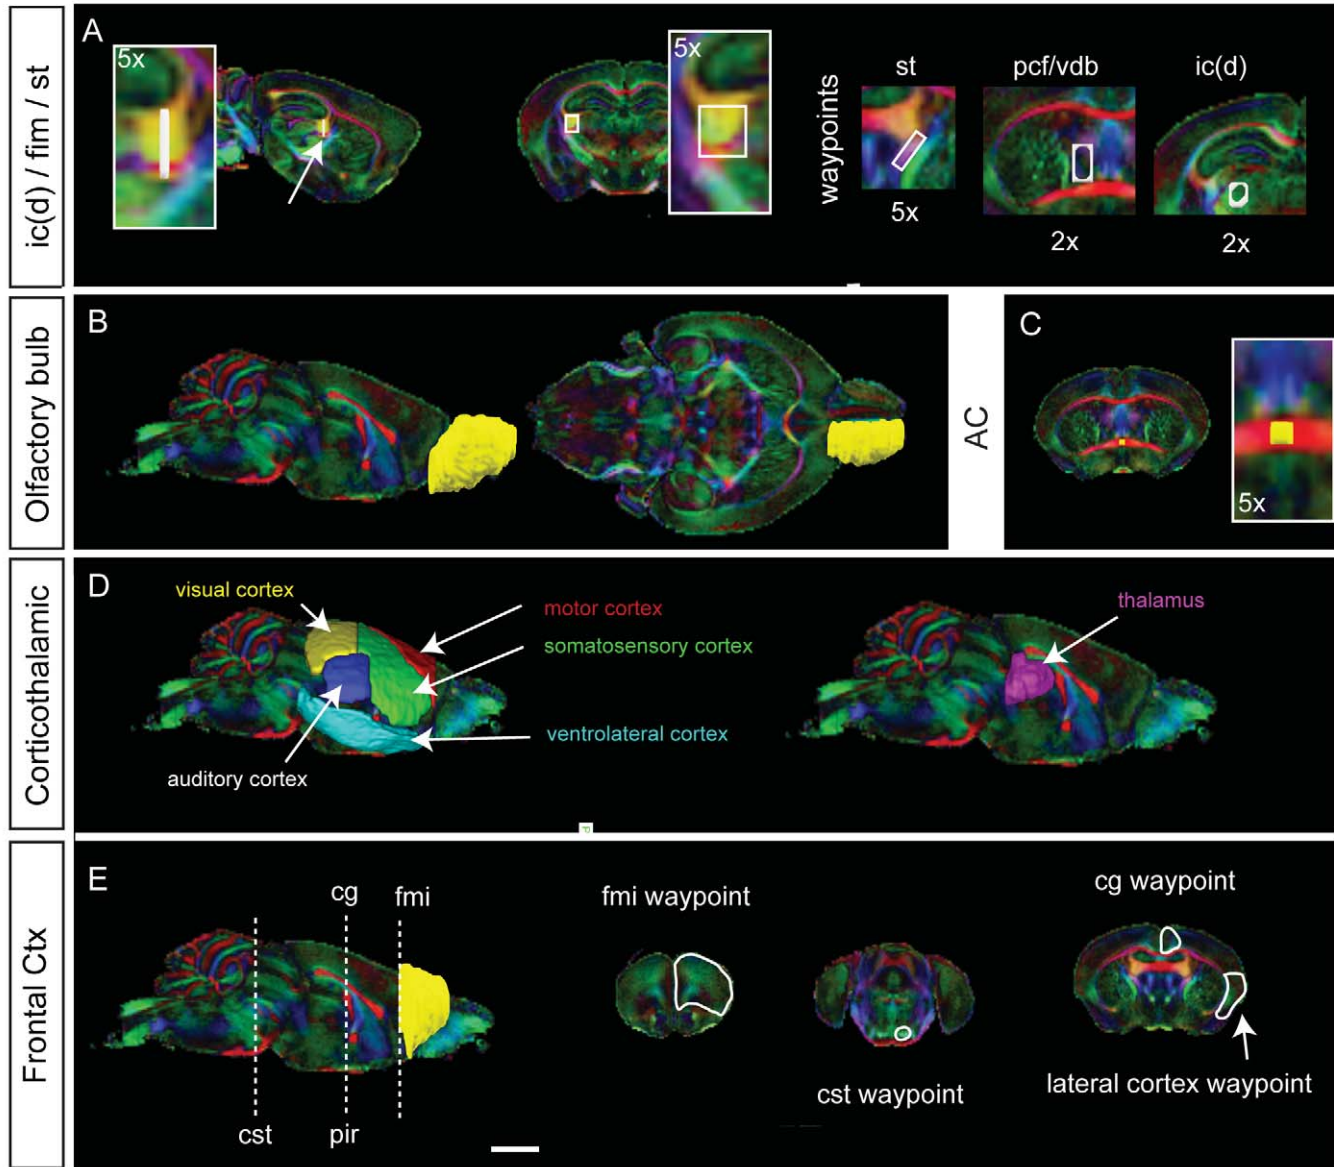

Supplement: NIHMS195872-supplement-01.pdf [file NIHMS195872-supplement-01.pdf]

Moldrich et al., Supplementary Figure 5

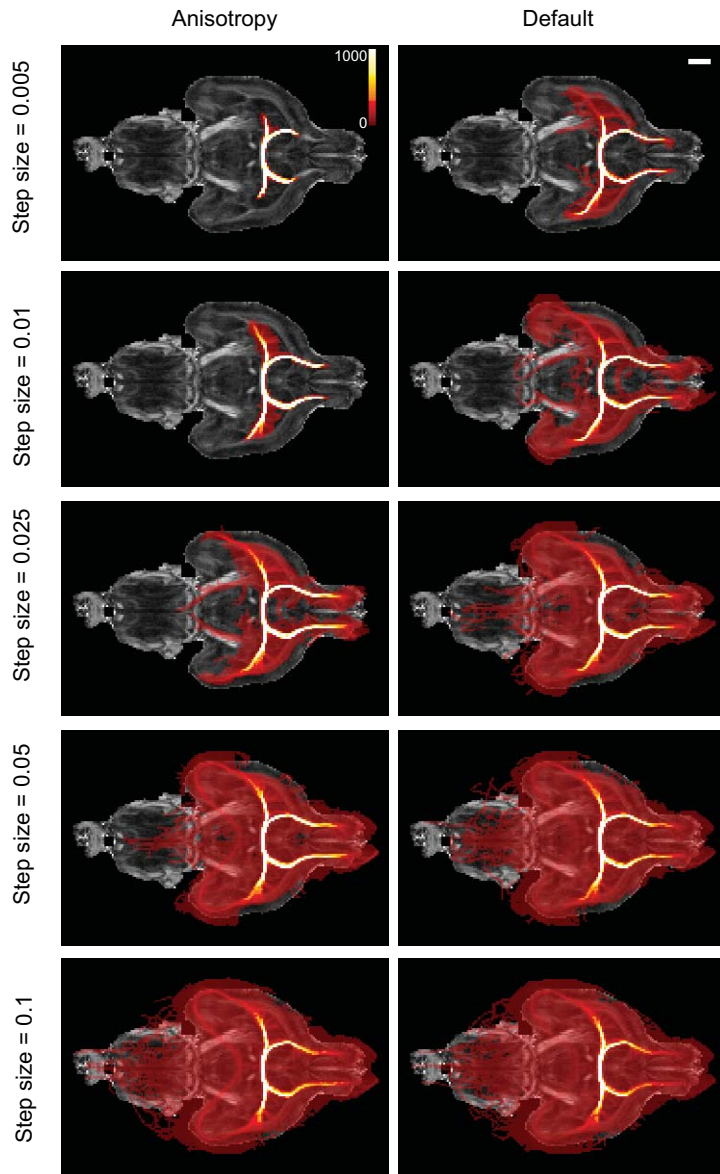

Supplement: NIHMS195872-supplement-05.pdf [file NIHMS195872-supplement-05.pdf]
